# Supplementary material for: Comparing the Impact on Latinos of a Depression Brochure and an Entertainment-Education Depression Fotonovela
Source: Atypon-hosted journal article supplement (doi:10.1176/appi.ps.201400146), 2014-12-17
Supplement: appi.ps.201400146.ds001.pdf [file appi.ps.201400146.ds001.pdf]

## Sample Characteristics

| Characteristics                       | Depression Brochure (N = 66) |    | Depression <i>Fotonovela</i> (N = 66) |    | Test statistic   | df  | p    |
|---------------------------------------|------------------------------|----|---------------------------------------|----|------------------|-----|------|
|                                       | N                            | %  | N                                     | %  |                  |     |      |
| Age (mean, SD) <sup>a</sup>           | 35.7 (12.0)                  |    | 36.15 (13.8)                          |    | t= -0.21         | 128 | 0.83 |
| Sex <sup>b</sup>                      |                              |    |                                       |    | $\chi^2 = 0.008$ | 1   | 0.93 |
| Male                                  | 33                           | 51 | 32                                    | 50 |                  |     |      |
| Female                                | 32                           | 49 | 32                                    | 50 |                  |     |      |
| Education <sup>c</sup>                |                              |    |                                       |    | $\chi^2 = 0.62$  | 1   | 0.43 |
| Less than high school                 | 42                           | 64 | 37                                    | 57 |                  |     |      |
| High school or more                   | 24                           | 36 | 28                                    | 43 |                  |     |      |
| Country of origin                     |                              |    |                                       |    | $\chi^2 = 5.06$  | 4   | 0.28 |
| Mexico                                | 38                           | 58 | 42                                    | 64 |                  |     |      |
| Guatemala                             | 5                            | 8  | 4                                     | 6  |                  |     |      |
| El Salvador                           | 7                            | 11 | 5                                     | 8  |                  |     |      |
| U.S.                                  | 14                           | 21 | 8                                     | 12 |                  |     |      |
| Other                                 | 2                            | 3  | 7                                     | 11 |                  |     |      |
| Years lived in the U. S. <sup>d</sup> |                              |    |                                       |    | $\chi^2 = 1.82$  | 2   | 0.40 |
| Less than 1 year                      | 3                            | 6  | 4                                     | 7  |                  |     |      |
| 1-5 years                             | 6                            | 12 | 12                                    | 21 |                  |     |      |
| 6 or more years                       | 41                           | 82 | 40                                    | 71 |                  |     |      |

Notes: <sup>a</sup>n = 130; <sup>b</sup>n = 129; <sup>c</sup>n = 131; <sup>d</sup>n = 128

Depression knowledge and stigma outcomes by intervention groups

| Outcomes                       | Depression Brochure<br>(n = 66) |      | Depression <i>Fotonovela</i><br>(n = 66) |      | Test-statistic |     |
|--------------------------------|---------------------------------|------|------------------------------------------|------|----------------|-----|
|                                | Mean                            | SD   | Mean                                     | SD   | t-test         | df  |
| Depression symptom knowledge   |                                 |      |                                          |      |                |     |
| Pre                            | 7.23                            | 1.43 | 7.18                                     | 1.54 | 0.18           | 130 |
| Post                           | 7.12                            | 1.51 | 7.61                                     | 1.52 | -1.84          | 130 |
| 1 month follow-up              | 7.24                            | 1.44 | 7.21                                     | 1.32 | 0.13           | 130 |
| Depression treatment knowledge |                                 |      |                                          |      |                |     |
| Pre                            | 3.67                            | 1.40 | 3.69                                     | 1.63 | -0.07          | 124 |
| Post                           | 4.78                            | 1.57 | 6.09                                     | 1.32 | -4.88***       | 114 |
| 1 month follow-up              | 4.54                            | 1.66 | 5.40                                     | 1.61 | -2.94**        | 123 |
| Social distance                |                                 |      |                                          |      |                |     |
| Pre                            | 0.67                            | 0.86 | 0.66                                     | 0.91 | 0.07           | 116 |
| Post                           | 0.58                            | 0.72 | 0.50                                     | 0.79 | 0.60           | 118 |
| 1 month follow-up              | 0.49                            | 0.71 | 0.48                                     | 0.84 | 0.15           | 124 |
| Dangerousness (Yes)            |                                 |      |                                          |      |                |     |
|                                | N                               | %    | N                                        | %    | $\chi^2$       | df  |
| Pre                            | 24                              | 41   | 21                                       | 35   | 0.41           | 1   |
| Post                           | 24                              | 39   | 15                                       | 24   | 3.26           | 1   |
| 1 month follow-up              | 29                              | 44   | 18                                       | 28   | 3.76           | 1   |

Notes: Symptom knowledge scores range from 0 to 10, higher scores indicate higher knowledge. Depression treatment knowledge scores range from 0 to 7, higher scores indicate higher knowledge. Social distance scores range from 0 to 3, higher scores indicate higher desire for social distance. Dangerousness is a dichotomous variable, no = 0 and yes = 1. \*p < 0.05, \*\*p ≤ 0.01, \*\*\*p ≤ 0.001.
